# Supplementary material for: Epidemiological and Clinical Features of Kawasaki Disease During the COVID-19 Pandemic in the United States
Source: PubMed Central journal article supplement (PMC9206189; doi:10.1001/jamanetworkopen.2022.17436), 2022-06-17
Supplement: jamanetwopen-e2217436-s001.pdf [file jamanetwopen-e2217436-s001.pdf]

## Supplemental Online Content

Burney JA, Roberts SC, DeHaan LL, et al; KIDCARE Study Investigators. Epidemiological and clinical features of Kawasaki disease during the COVID-19 pandemic in the United States. *JAMA Netw Open*. 2022;5(6):e2217436. doi:10.1001/jamanetworkopen.2022.17436

**eTable 1.** Participating Sites and Number of KD Cases (2018-2020) Grouped by Region

**eTable 2.** Summary of Missing Data From RCHSD Data Set

**eTable 3.** RCHSD Patients by Year and Pandemic-Defined Time Period

**eTable 4.** Demographic and Clinical Characteristics of Patients With KD at RCHSD, by Time Period

**eFigure 1.** KD Across 28 KIDCARE Sites Grouped by Region

**eFigure 2.** KD Incidence in 2020-2021 in San Diego (Patients per Month) Compared With 2002-2019 Baseline, Total and by Age Group

**eFigure 3.** KD Incidence in 2020-2021 in San Diego (Patients per Month) Compared With 2002-2019 Baseline, Fraction of Male Patients

**eFigure 4.** KD Incidence in 2020-2021 in San Diego (Patients per Month) Compared With 2002-2019 Baseline, by Race and Ethnicity

**eFigure 5.** Trends in Age of Patients With KD at RCHSD, 2002-2021

**eFigure 6.** Distribution of Laboratory Values for Patients With KD Seen at RCHSD

**eFigure 7.** Mobility Patterns Around COVID-19 Pandemic Onset in Southern California

**eFigure 8.** KD, Income, and Mobility by Year

**eFigure 9.** Laboratory Values for Patients With KD by Pandemic-Defined Season

**eFigure 10.** Clinical Presentation of Patients With KD in 2020 and 2021, Compared With 2002-2019 Baseline, by Pandemic-Defined Season

**eFigure 11.** Geographic Distribution of Patients With KD in RCHSD Data Set, 2019-2021

**eFigure 12.** Association Between Census Block Group–Level Median Household Income and Median Time Spent Away From Home

**eFigure 13.** KD Fever Onset by Day of Week

This supplemental material has been provided by the authors to give readers additional information about their work.

**eTable 1. Participating Sites and Number of KD Cases (2018-2020) Grouped by Region**

| Participating Sites (n=28)                          | 2018 | 2019 | 2020 | Total # of KD cases (%) |
|-----------------------------------------------------|------|------|------|-------------------------|
| <b>West Coast</b>                                   |      |      |      |                         |
| Cedars-Sinai Medical Center, Los Angeles, CA        | 1    | 3    | 1    | 5 (0.2)                 |
| Children's Hospital Los Angeles, CA                 | 44   | 47   | 42   | 133 (5.4)               |
| Children's Hospital Orange County, CA               | 39   | 51   | 26   | 116 (4.7)               |
| Harbor UCLA, CA                                     | 3    | 2    | 5    | 10 (0.4)                |
| Miller Children's Hospital Long Beach, CA           | 37   | 38   | 26   | 101 (4.1)               |
| Rady Children's Hospital San Diego, CA              | 74   | 95   | 43   | 212 (8.6)               |
| Seattle Children's, WA                              | 41   | 36   | 29   | 106 (4.3)               |
| Mattel Children's Hospital, UCLA, CA                | 8    | 3    | 2    | 13 (0.5)                |
| Benioff Children's Hospital, UCSF-Oakland, CA       | 28   | 27   | 19   | 74 (3.0)                |
| Benioff Children's Hospital, UCSF-San Francisco, CA | 8    | 9    | 7    | 24 (1.0)                |
| University of California Davis, CA                  | 13   | 15   | 9    | 37 (1.5)                |
| <b>Midwest</b>                                      |      |      |      |                         |
| Children's Hospital of Michigan, MI                 | 22   | 30   | 26   | 78 (3.2)                |
| Indiana University, IN                              | 38   | 30   | 19   | 87 (3.5)                |

|                                              |     |    |    |            |
|----------------------------------------------|-----|----|----|------------|
| Lurie Children's Hospital, Chicago, IL       | 52  | 39 | 23 | 114 (4.6)  |
| Nationwide Children's Hospital, Columbus, OH | 37  | 28 | 30 | 95 (3.9)   |
| University of Chicago, Chicago, IL           | 10  | 5  | 4  | 19 (0.8)   |
| <b>Northeast</b>                             |     |    |    |            |
| Boston Children's Hospital, MA               | 36  | 43 | 37 | 116 (4.7)  |
| Children's National Hospital, Washington DC  | 60  | 46 | 32 | 138 (5.6)  |
| Maria Fareri Children's, NY                  | 16  | 12 | 6  | 34 (1.4)   |
| <b>Mountain West &amp; Plains</b>            |     |    |    |            |
| Children's Hospital Colorado, CO             | 56  | 63 | 50 | 169 (6.9)  |
| University of Nebraska Medical Center, NE    | 24  | 20 | 12 | 56 (2.3)   |
| University of South Dakota-Sanford, SD       | 10  | 2  | 0  | 12 (0.5)   |
| University of Utah, UT                       | 30  | 25 | 20 | 75 (3.0)   |
| <b>Southeast</b>                             |     |    |    |            |
| Arkansas Children's Hospital, AR             | 15  | 23 | 5  | 43 (1.7)   |
| Emory University, Atlanta, GA                | 137 | 88 | 91 | 316 (12.8) |
| University of Alabama, AL                    | 39  | 51 | 29 | 119 (4.8)  |
| University of Texas Southwestern, Dallas, TX | 7   | 67 | 30 | 104 (4.2)  |
| Vanderbilt, Nashville, TN                    | 19  | 19 | 17 | 55 (2.2)   |

|              |     |     |     |      |
|--------------|-----|-----|-----|------|
| <b>Total</b> | 909 | 936 | 646 | 2461 |
|--------------|-----|-----|-----|------|

**eTable 2. Summary of Missing Data From RCHSD Data Set**

|                                      | 1/1/02 - 2/28/20 | 3/1/20 - 11/15/21 |
|--------------------------------------|------------------|-------------------|
| Characteristic*                      | n= 1396          | n= 65             |
| Sex                                  | 0                | 0                 |
| Age                                  | 0                | 0                 |
| Ethnicity                            | 15 (1.1)         | 0                 |
| CA Z-worst                           | 24 (1.7)         | 0                 |
| Strawberry tongue                    | 536 (38.4)       | 13 (20.0)         |
| Enlarged lymph node                  | 11 (8.0)         | 0                 |
| Peeling                              | 4 (3.0)          | 1                 |
| Illness Day of lab data collection** | 118 (8.5)        | 0                 |
| WBC                                  | 128 (9.2)        | 0                 |
| ANC                                  | 137 (9.8)        | 0                 |
| z-Hgb                                | 131 (9.4)        | 0                 |
| Platelets                            | 129 (9.2)        | 0                 |
| ESR                                  | 166 (11.9)       | 2 (3.1)           |
| CRP                                  | 147 (10.5)       | 1 (1.5)           |

\*: Values are n (%)

\*\* : Laboratory data was only analyzed for patients with laboratory data collected within the first 15 days after fever onset. Patients may arrive at RCHSD after a series of visits to other physicians results in a referral and may thus be first diagnosed after the laboratory data collection time window has passed.

**eTable 3. RCHSD Patients by Year and Pandemic-Defined Time Period**

| <b>Year</b>         | <b># of pts.</b> | <b>Year</b> | <b># of pts.</b> |                                      |                          |                          |                          |
|---------------------|------------------|-------------|------------------|--------------------------------------|--------------------------|--------------------------|--------------------------|
| <b>2002</b>         | 60               | <b>2012</b> | 79               |                                      |                          |                          |                          |
| <b>2003</b>         | 55               | <b>2013</b> | 86               |                                      |                          |                          |                          |
| <b>2004</b>         | 58               | <b>2014</b> | 95               |                                      |                          |                          |                          |
| <b>2005</b>         | 60               | <b>2015</b> | 82               |                                      |                          |                          |                          |
| <b>2006</b>         | 57               | <b>2016</b> | 111              |                                      |                          |                          |                          |
| <b>2007</b>         | 63               | <b>2017</b> | 83               | <b>Pandemic-defined time periods</b> |                          |                          |                          |
| <b>2008</b>         | 77               | <b>2018</b> | 74               |                                      | <b>01/01 -<br/>03/05</b> | <b>03/06 -<br/>05/31</b> | <b>06/01 -<br/>12/31</b> |
| <b>2009</b>         | 80               | <b>2019</b> | 95               | <b>2002-2019<br/>(average)</b>       | 341<br>(18.9)            | 354<br>(19.7)            | 687<br>(38.2)            |
| <b>2010</b>         | 90               | <b>2020</b> | 43               | <b>2020</b>                          | 16                       | 14                       | 13                       |
| <b>2011</b>         | 77               | <b>2021</b> | 36               | <b>2021</b>                          | 7                        | 6                        | 23                       |
| <b>Total = 1461</b> |                  |             |                  | <b>Total</b>                         | <b>364</b>               | <b>374</b>               | <b>723</b>               |

**eTable 4. Demographic and Clinical Characteristics of Patients With KD at RCHSD, by Time Period**

These data are presented graphically in Figure 2 in the main manuscript. For patient counts: for the 2002-2019 base period, average value (% of total) are shown; for 2020 and 2021, raw numbers (% of total) are shown.

|                                 | Base Period<br>2002-2019<br>(average) | 2020      | 2021      | p-value<br>(2020-Base) | p-value<br>(2021-Base) |
|---------------------------------|---------------------------------------|-----------|-----------|------------------------|------------------------|
| <b>Total</b>                    | 76.8                                  | 43        | 36        | <b>0.022</b>           | <b>0.009</b>           |
| <b>Age Group</b>                |                                       |           |           |                        |                        |
| < 1 year                        | 13.4 (17.4)                           | 6 (14.0)  | 12 (33.3) | <b>0.045</b>           | 0.370                  |
| 1 to 5 years                    | 44.9 (58.5)                           | 22 (51.2) | 18 (50.0) | <b>0.016</b>           | <b>0.007</b>           |
| 5 to 10 years                   | 15.4 (20.0)                           | 13 (30.2) | 5 (13.9)  | 0.377                  | 0.091                  |
| At least 10 years               | 3.1 (4.1)                             | 2 (4.7)   | 1 (2.8)   | 0.266                  | 0.121                  |
| <b>Fraction Male</b>            | 0.6                                   | 0.49      | 0.61      | <b>0.013</b>           | 0.423                  |
| <b>Race/Ethnicity</b>           |                                       |           |           |                        |                        |
| Afr. American                   | 3.2 (4.1)                             | 0 (0)     | 1 (2.3)   | <b>0.017</b>           | 0.066                  |
| Asian                           | 11.8 (15.4)                           | 4 (11.1)  | 3 (7.0)   | <b>0.046</b>           | <b>0.030</b>           |
| Hispanic                        | 26.5 (34.5)                           | 14 (38.9) | 21 (48.8) | 0.079                  | 0.262                  |
| Indigenous American             | 1.0 (1.3)                             | 0 (0)     | 0         | NA                     | NA                     |
| Mixed                           | 15.5 (20.2)                           | 11 (30.6) | 5 (11.6)  | 0.197                  | <b>0.028</b>           |
| Other                           | 1.5 (2.0)                             | 0 (0)     | 1 (2.3)   | <b>0.019</b>           | 0.219                  |
| Pacific Islander                | 1.0 (1.3)                             | 0 (0)     | 0 (0)     | NA                     | NA                     |
| Unknown                         | 2.5 (3.3)                             | 0 (0)     | 0 (0)     | 0.141                  | 0.141                  |
| White                           | 17.7 (23.1)                           | 14 (38.9) | 5 (11.6)  | 0.154                  | <b>0.001</b>           |
| <b>Clinical Characteristics</b> |                                       |           |           |                        |                        |
| Fraction Peeling                | 0.58                                  | 0.47      | 0.47      | 0.160                  | 0.224                  |
| Fraction w/ Strawberry Tongue   | 0.63                                  | 0.39      | 0.41      | <b>0.019</b>           | 0.074                  |
| Fraction w/ Lymph Node          | 0.32                                  | 0.21      | 0.39      | 0.135                  | 0.474                  |
| <b>Laboratory Values</b>        |                                       |           |           |                        |                        |
| WBC                             | 13.2                                  | 12.5      | 13.7      | 0.922                  | 0.565                  |
| ANC                             | 8580                                  | 9585      | 8286      | 0.402                  | 0.587                  |
| PLT                             | 362                                   | 361       | 382       | 0.905                  | 0.835                  |
| CRP                             | 6.7                                   | 5.75      | 6.75      | 0.531                  | 0.646                  |
| ESR                             | 60                                    | 53        | 62        | 0.108                  | 0.530                  |
| Z-hemoglobin                    | -1.33                                 | -1.38     | -1.90     | 0.307                  | <b>0.035</b>           |

Values for Age Group and Ethnicity are n (%). Values for Fraction Male and Clinical Characteristics are fractions (0 to 1). Laboratory values are medians. Laboratory data was only analyzed for patients with laboratory data collected within the first 15 days after fever onset. Patients may arrive at RCHSD after a series of visits to other physicians results in a referral and may thus be first diagnosed after the laboratory data collection time window has passed. Bold text for p-values indicates p<0.05.

**eFigure 1. KD Across 28 KIDCARE Sites Grouped by Region**

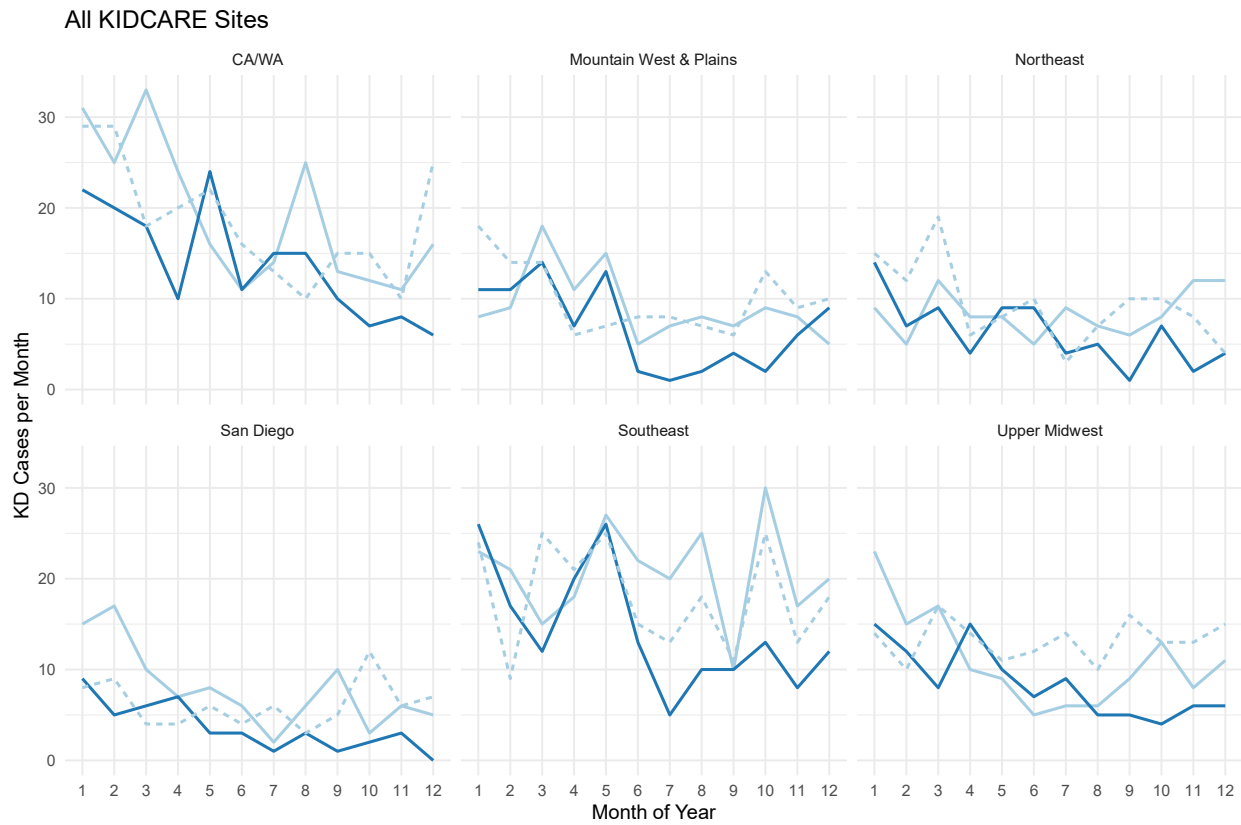

KD incidence: 2018: light blue dashed lines; 2019: light blue solid lines; 2020: dark blue lines. Sites included in each region are listed in Table 1 in the main manuscript.



**eFigure 2. KD Incidence in 2020-2021 in San Diego (Patients per Month) Compared With 2002-2019 Baseline, Total and by Age Group**

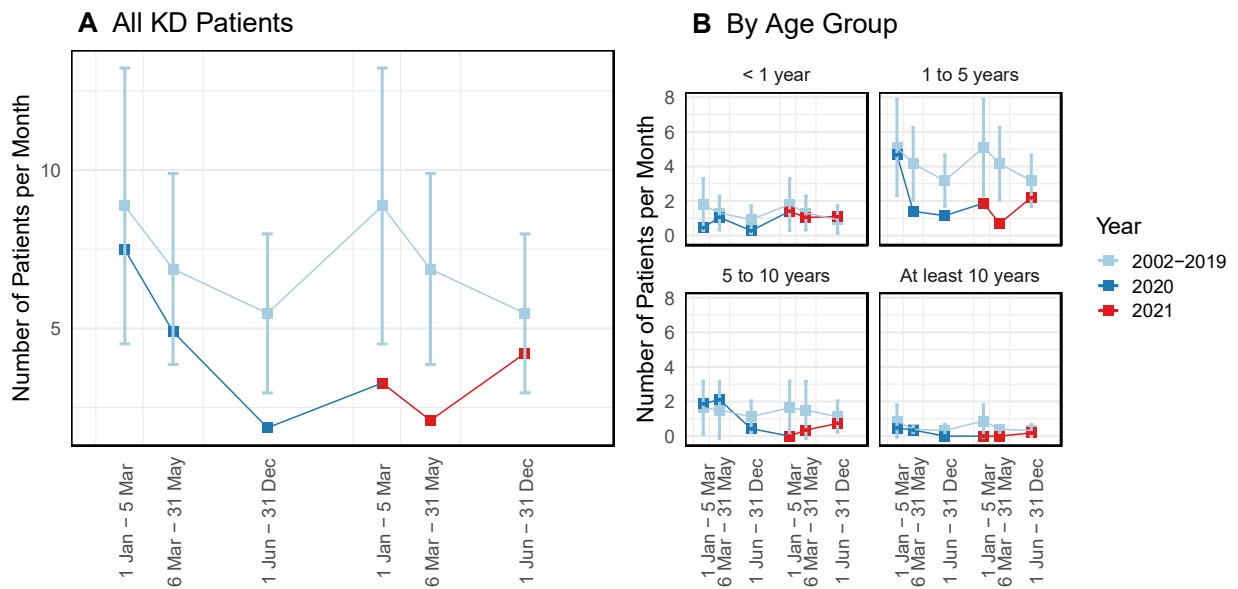

As in the main manuscript, dark blue = 2020 and red = 2021; these are shown in comparison to 2002-2019 historic average  $\pm$  2 SE (light blue). Data are shown over a two-year cycle (the light blue historical values are repeated) to cover the pandemic period. Temporal aggregation is defined by 2020 pandemic-relevant periods. By March 5th, the emergence of a clear decline in human movement around San Diego County marked the beginning of the initial shutdown period, which lasted until early June. In April 2021, all adults became eligible for vaccines, and thereafter CDC issued guidance that vaccinated individuals could stop masking. Dividing the data into these pandemic-defined periods is helpful since KD also has a known seasonality (Figure 1, main manuscript).

**eFigure 3. KD Incidence in 2020-2021 in San Diego (Patients per Month) Compared With 2002-2019 Baseline, Fraction of Male Patients**

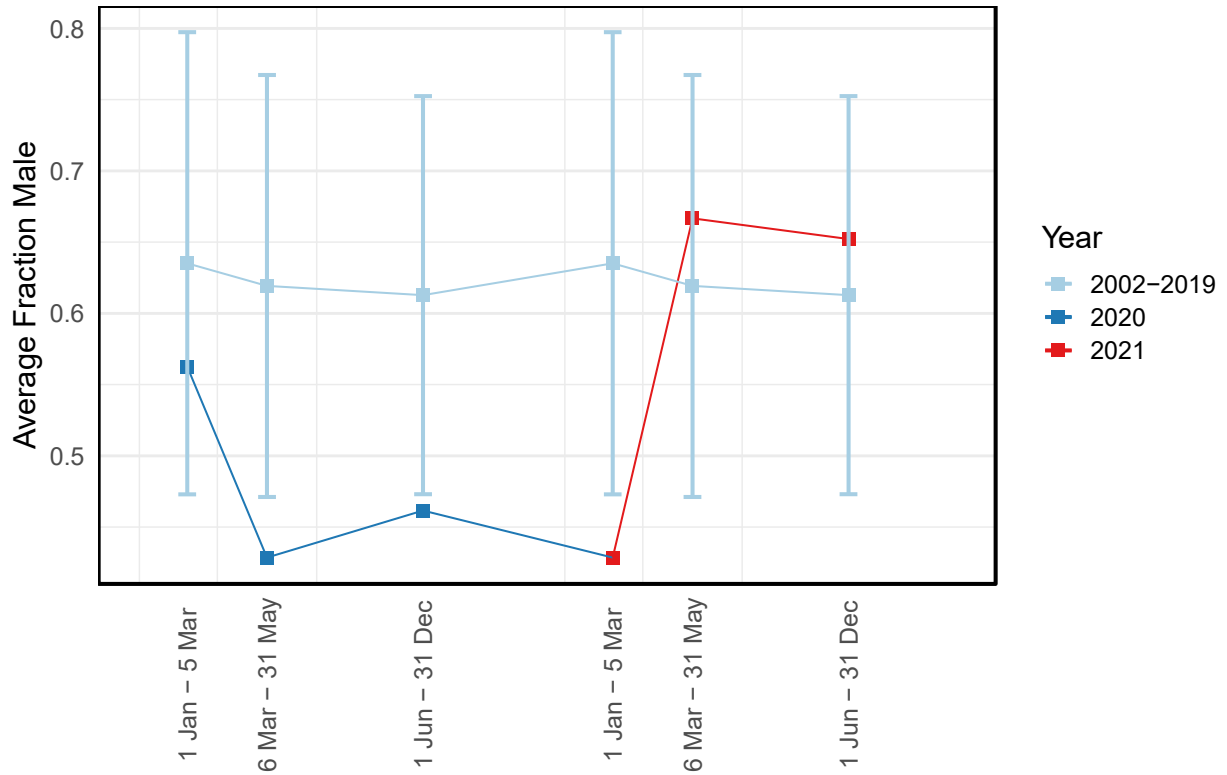

As in Supplemental Figure 2, but for the fraction of KD patients that were male.

**eFigure 4. KD Incidence in 2020-2021 in San Diego (Patients per Month) Compared With 2002-2019 Baseline, by Race and Ethnicity**

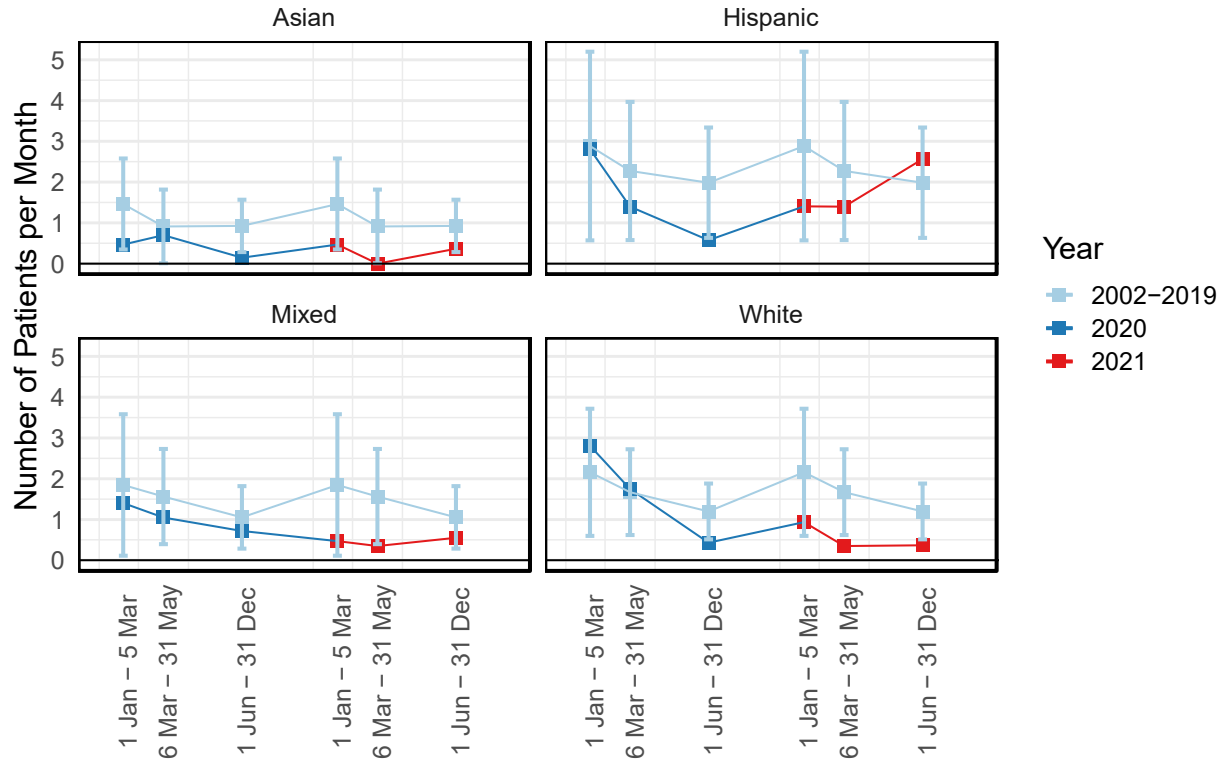

As in Supplemental Figure 2, but for the race/ethnicity of KD patients (groups with highest incidence shown).

**eFigure 5. Trends in Age of Patients With KD at RCHSD, 2002-2021**

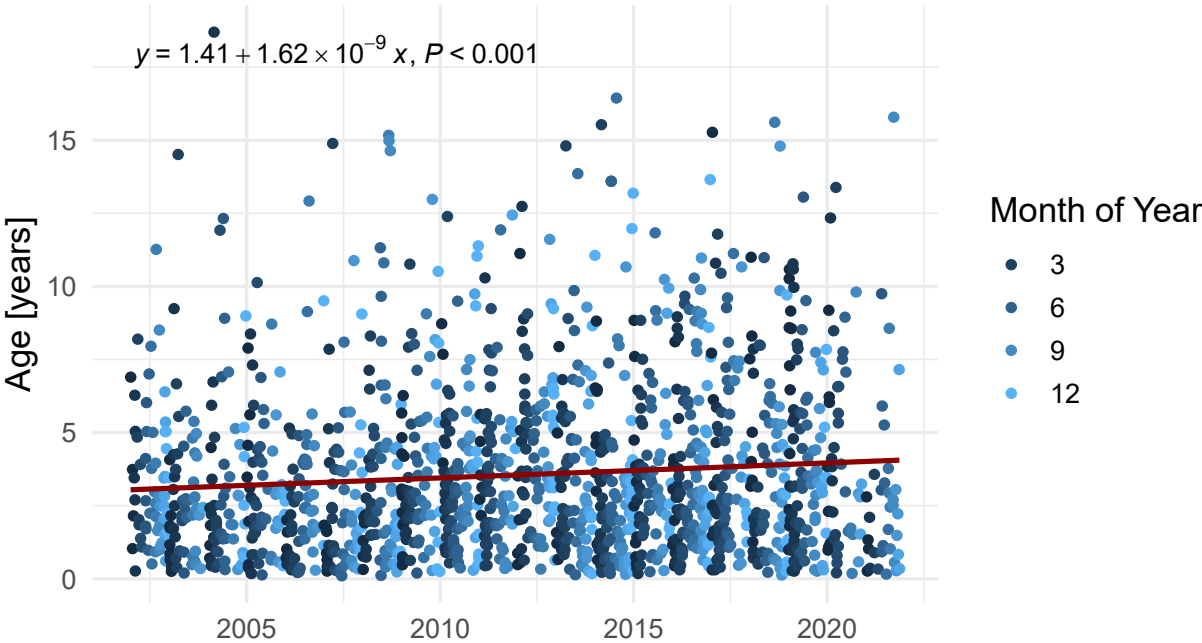

The age of KD patients in San Diego has increased over time. Shade of blue indicates quarter of the year (dark=Q1, lightest=Q4), to aid in qualitatively showing seasonality of incidence.

**eFigure 6. Distribution of Laboratory Values for Patients With KD Seen at RCHSD**

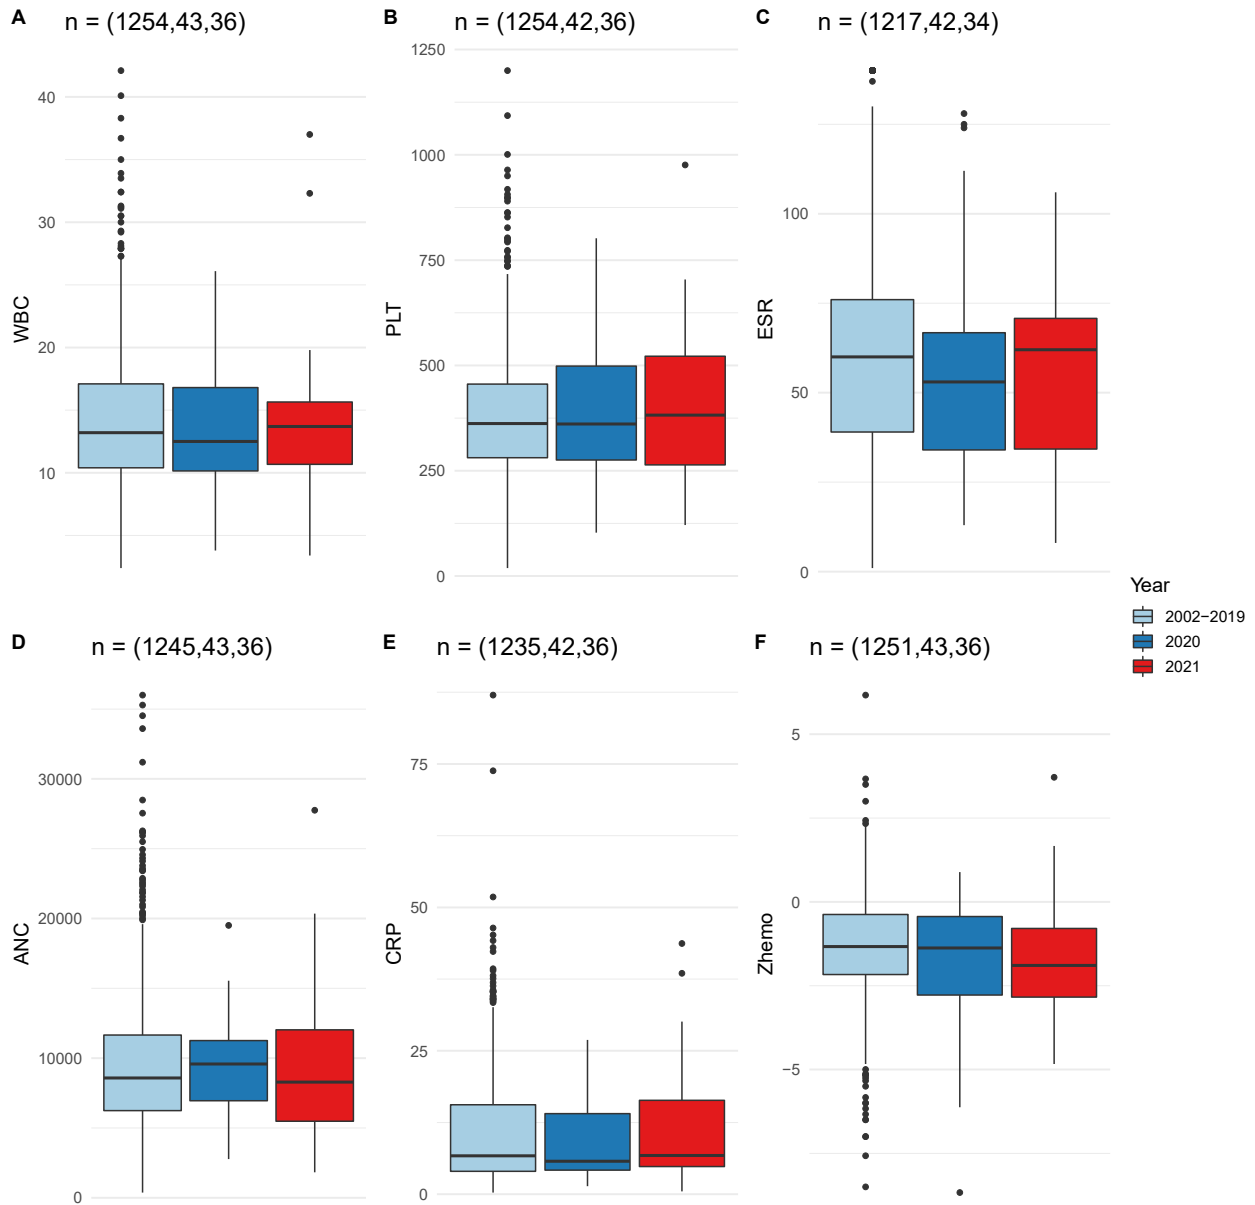

A-F: WBC, Platelets, ESR, ANC, CRP, and Hemoglobin Z-score (hemoglobin concentration normalized for age), respectively, shown for the historical period (2002-2019), 2020, and 2021. Boxes show the IQR for each value, and whiskers show the 95th percentile confidence interval; values beyond that are shown as dots. Numbers of patients in each time period (2002-2019, 2020, 2021) are provided above each panel; full description of missing data is provided in eTable 2. Abbreviations: WBC: white blood cell count, ESR: erythrocyte sedimentation rate, ANC: absolute neutrophil count, CRP: C-reactive protein, Zhemmo: hemoglobin Z-score.

**eFigure 7. Mobility Patterns Around COVID-19 Pandemic Onset in Southern California**

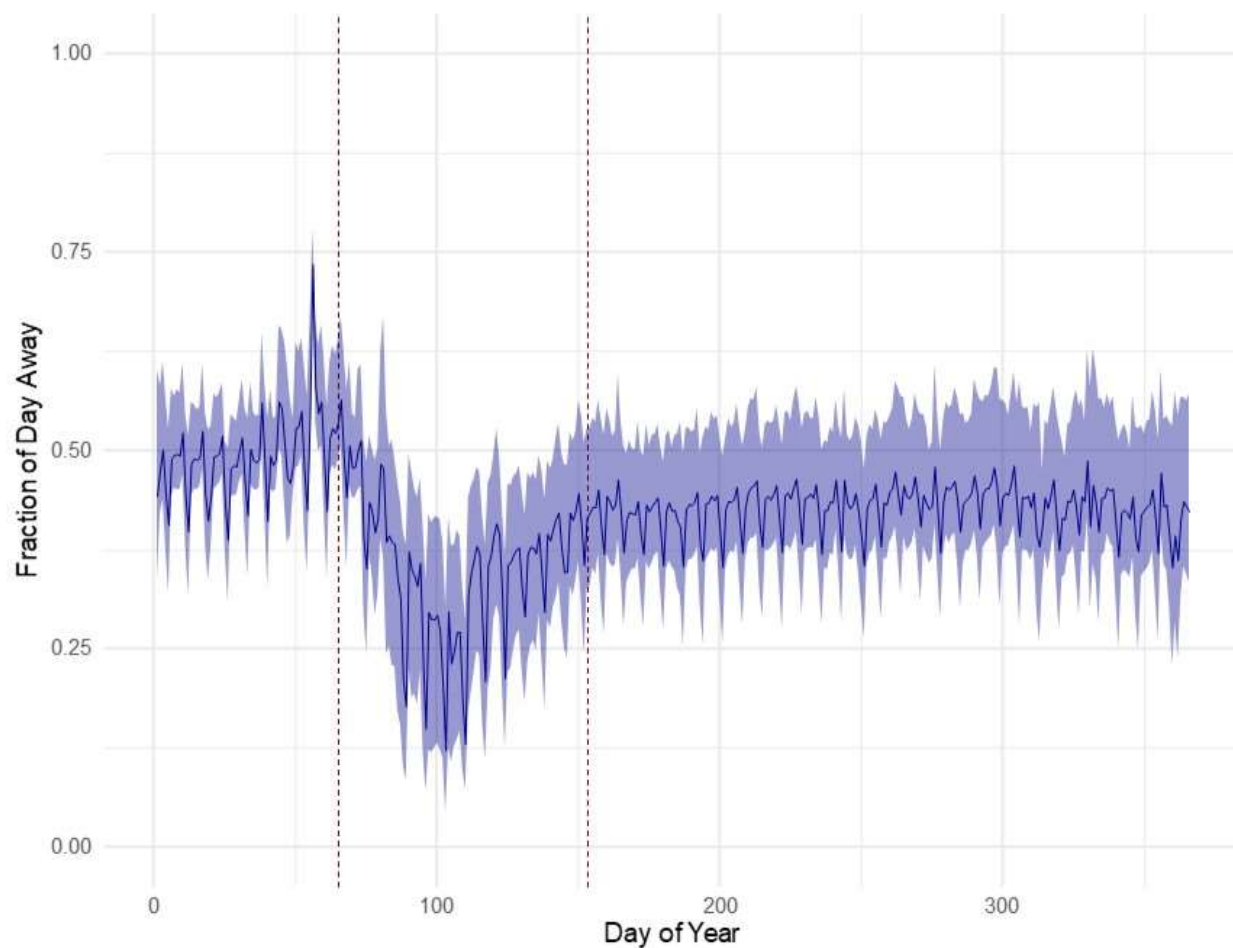

Mobility, defined as the fraction of the day spent away from home, for all southern California Census Block Groups by day for 2020. Dark line shows the median value, with the shaded range showing the IQR.

**eFigure 8. KD, Income, and Mobility by Year**

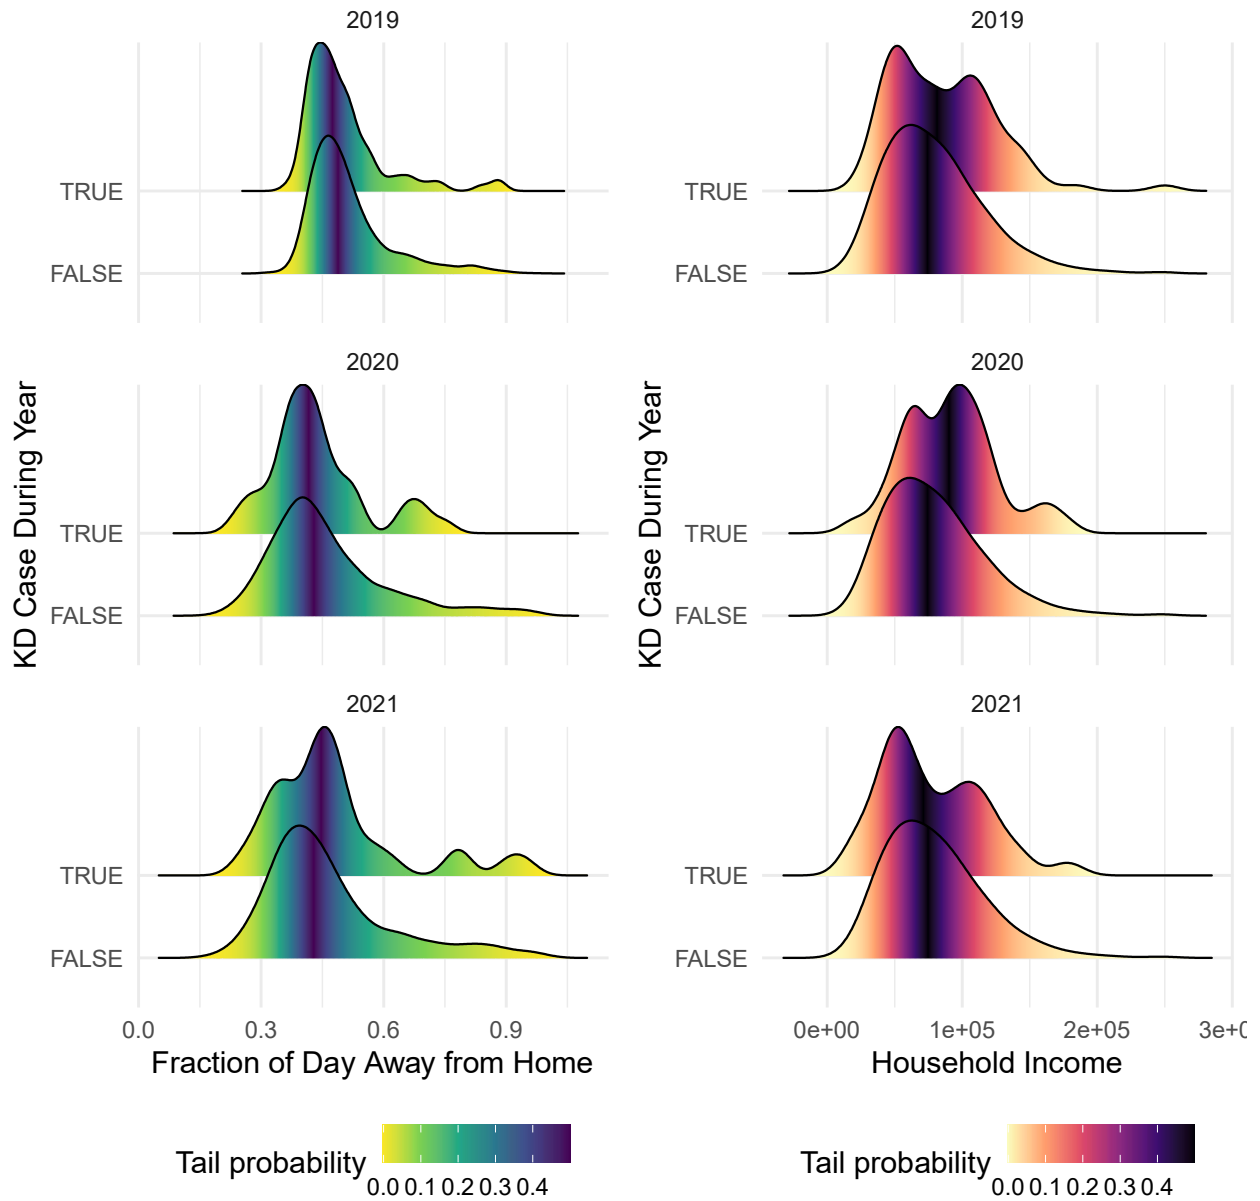

Mobility and income distributions for CBGs that had (TRUE) or did not have (FALSE) KD cases during each year. Mobility differences are not statistically significant ( $p > 0.1$ ); the difference in median CBG household income in 2020 is statistically significant ( $p = 0.037$ ).

## eFigure 9. Laboratory Values for Patients With KD by Pandemic-Defined Season

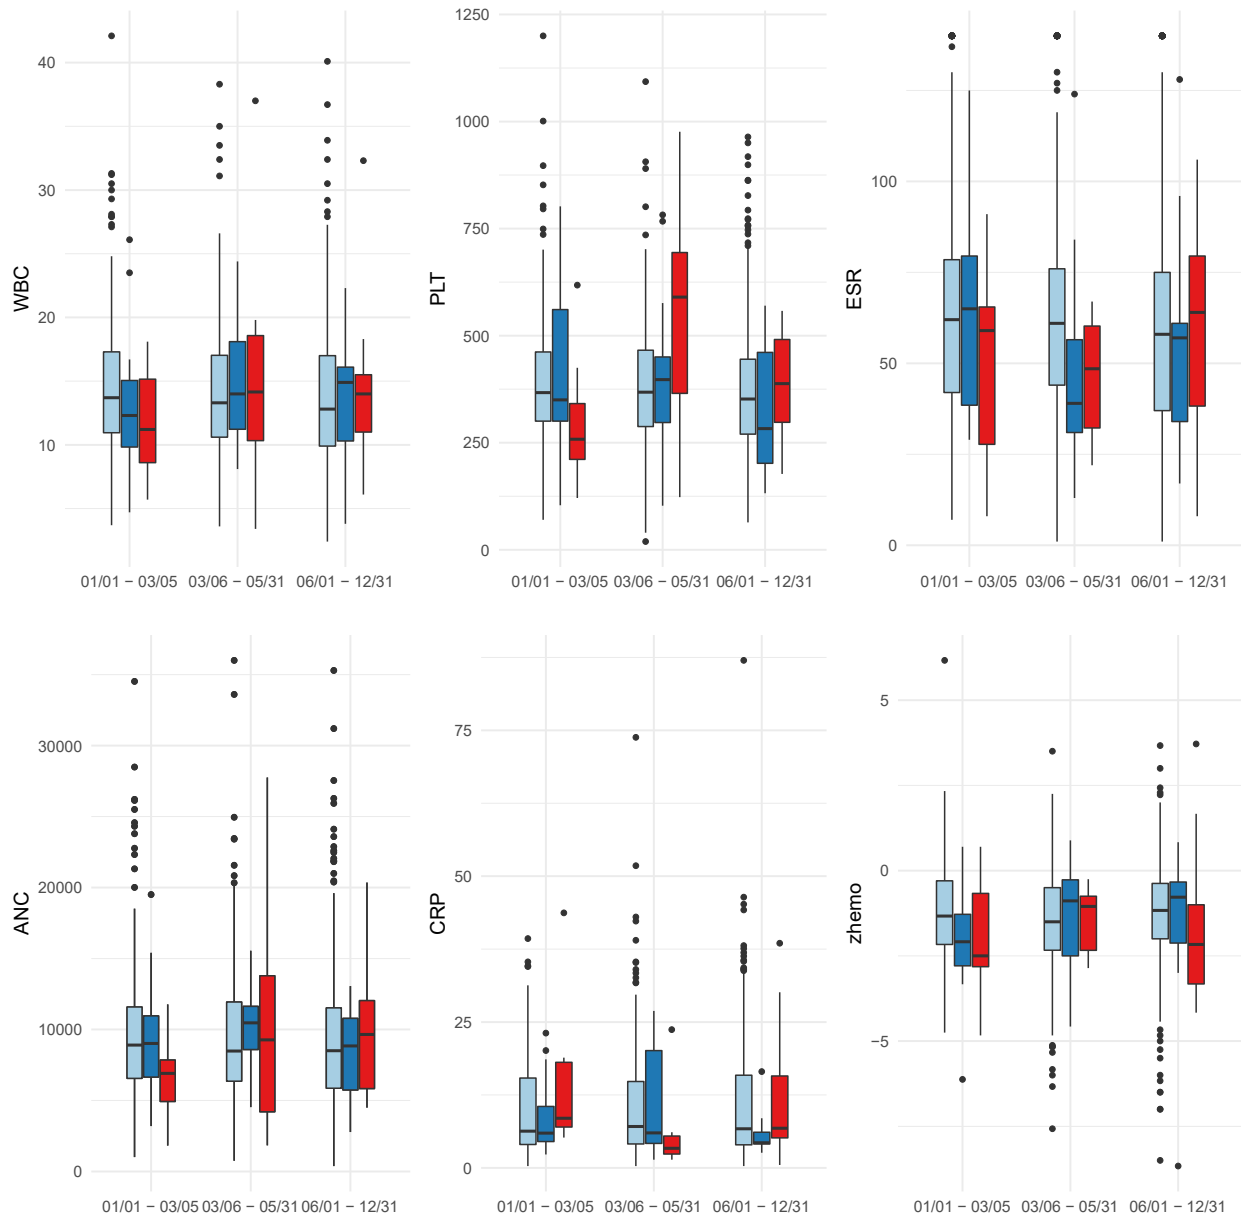

Comparison of laboratory values for KD patients in the 2002-2019 baseline period (light blue boxes), 2020 (dark blue boxes), and 2021 (red boxes). Black horizontal line is median, box is IQR, and whiskers are the 95% with outliers shown as black dots. (Numbers of patients for each time period are shown in eTable 2.) There were no statistically significant differences across years by time period (Kruskal-Wallis tests). Abbreviations: WBC: white blood cell count, ESR: erythrocyte sedimentation rate, ANC: absolute neutrophil count, CRP: C-reactive protein, Zhemo: hemoglobin Z-score.



**eFigure 10. Clinical Presentation of Patients With KD in 2020 and 2021, Compared With 2002-2019 Baseline, by Pandemic-Defined Season**

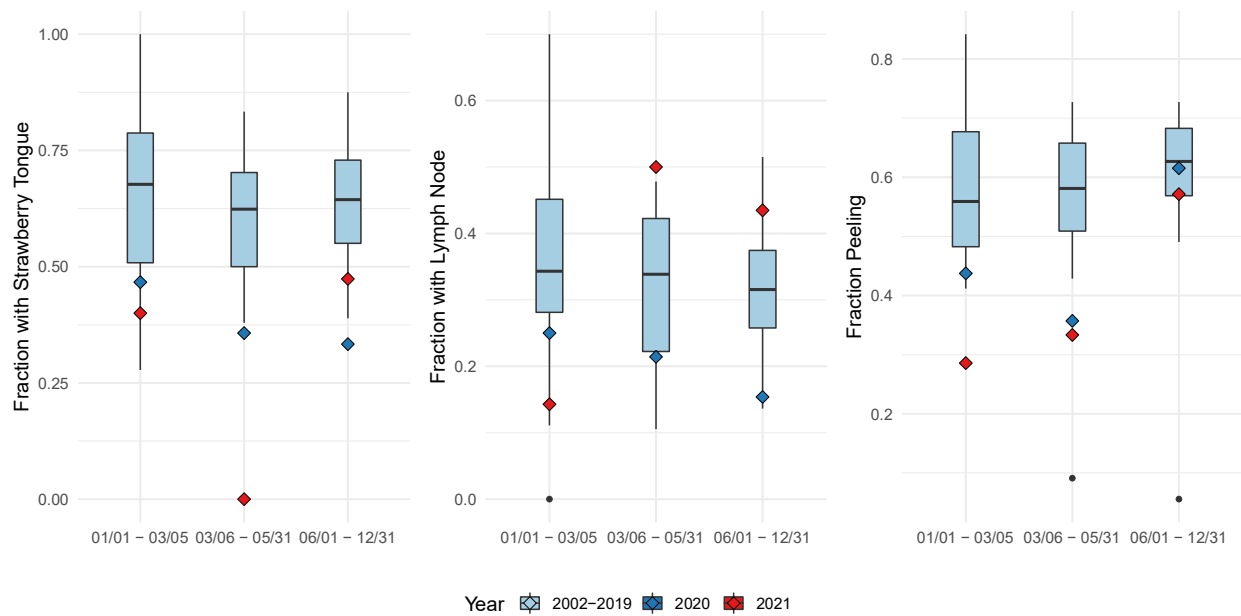

Characteristics of clinical presentation of KD patients by pandemic-defined periods, historical period, (light blue boxes, median and IQR of 18 years), 2020 (dark blue diamond), and 2021 (red diamond). Numbers of patients are provided in eTable 3.

**eFigure 11. Geographic Distribution of Patients With KD in RCHSD Data Set, 2019-2021**

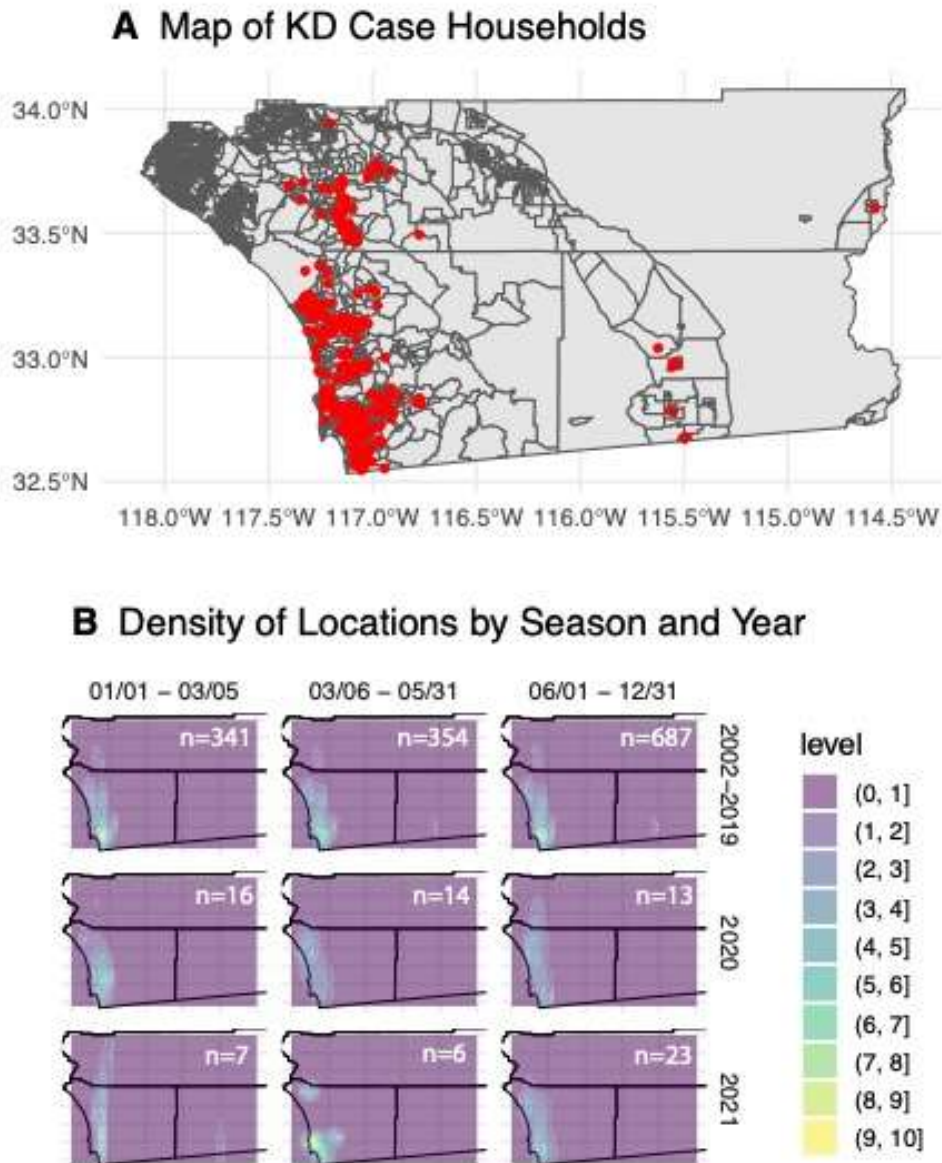

A: Map of 4744 Census Block Groups across the three southernmost California counties (San Diego, Imperial, Riverside). Dark grey outlines show CBG borders. Red dots show residences of all KD cases between 2019-2021. B: Normalized geographic distributions of KD case residences by pandemic periods defined in 2020 and year. Some of the shift northwards during the pandemic reflects a longer-run trend in populations in San Diego County, but the distribution shifts back towards historical bounds in spring-summer 2021.

## eFigure 12. Association Between Census Block Group–Level Median Household Income and Median Time Spent Away From Home

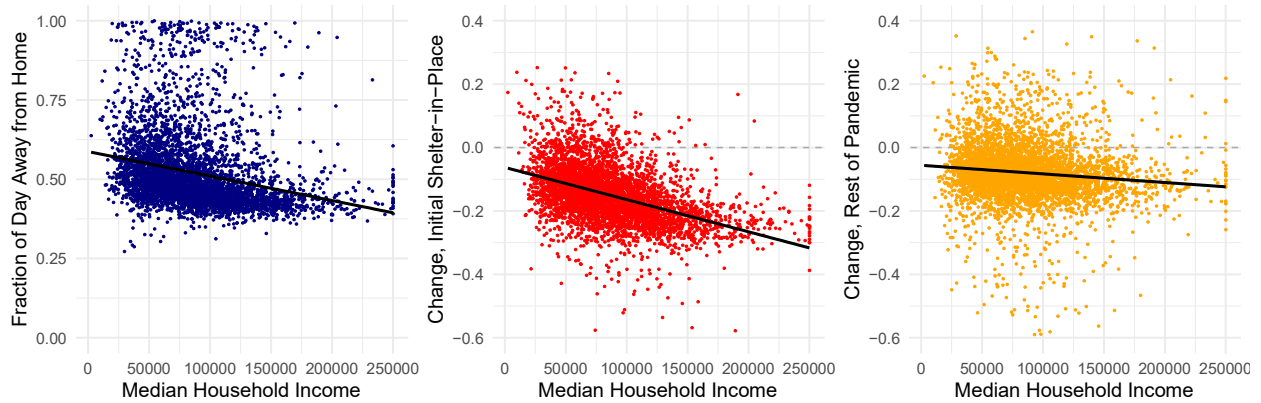

The relationship between income and time spent away from home in Southern California (4744 CBGs) over the pre-pandemic period in 2020 (left, blue) and different phases of the pandemic in 2020 (red=shelter-in-place, yellow=remainder of 2020). The relationship is highly significant ( $p < 1e-14$  for each) but the slope for the latter part of 2020 is ~29% of the slope for the initial shelter-in-place period ( $-2.9e-7$  vs.  $-1.0e-6$ ).

**eFigure 13. KD Fever Onset by Day of Week**

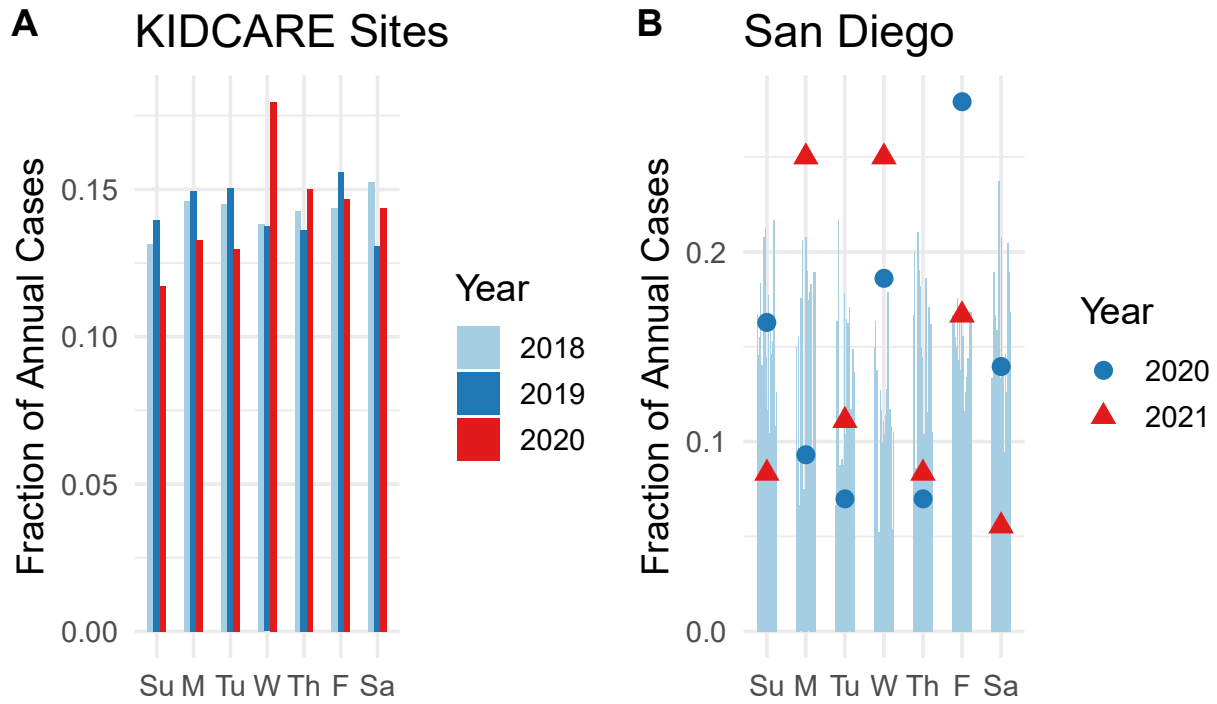

KD onset of fever by day of week, historically and during pandemic period, for KIDCARE sites and San Diego. For San Diego, light blue bars show each year 2002-2019. Due to the small number of years for the multi-site study (A) and the small numbers of cases during 2020 and 2021 in the RCHSD dataset (B) we do not assess statistical significance.
