# Supplementary material for: Epidemiological and Clinical Features of Kawasaki Disease During the COVID-19 Pandemic in the United States
Source: PubMed Central journal article supplement (PMC9206189; doi:10.1001/jamanetworkopen.2022.17436), 2022-06-17
Supplement: jamanetwopen-e2217436-s002.pdf [file jamanetwopen-e2217436-s002.pdf]

\*First name, last name, and suffix (if applicable) are required and will appear in PubMed.

| <b>*Group Name(s): KIDCARE Study Investigators</b> |                   |                              |                         |                                                     |                                                 |                                                                |                                                                                                   |
|----------------------------------------------------|-------------------|------------------------------|-------------------------|-----------------------------------------------------|-------------------------------------------------|----------------------------------------------------------------|---------------------------------------------------------------------------------------------------|
| <b>*First Name and Middle Initial(s)</b>           | <b>*Last Name</b> | <b>*Suffix (eg, Jr, III)</b> | <b>Academic Degrees</b> | <b>Institution</b>                                  | <b>Location (city, state/province, country)</b> | <b>Role or Contribution, eg, chair, principal investigator</b> | <b>Group (if more than 1 Group listed in the byline) and/or Subgroup (eg, Steering Committee)</b> |
| Moshe                                              | Arditi            |                              | MD                      | Cedars-Sinai Medical Center, Los Angeles, CA        | Los Angeles, CA                                 | Co-investigator                                                |                                                                                                   |
| Jackie                                             | Szmuszkovicz      |                              | MD                      | Children's Hospital Los Angeles, CA                 | Los Angeles, CA                                 | Co-investigator                                                |                                                                                                   |
| Negar                                              | Ashouri           |                              | MD                      | Children's Hospital Orange County, CA               | Orange, CA                                      | Co-investigator                                                |                                                                                                   |
| Sylvia                                             | Yeh               |                              | MD                      | Harbor UCLA, CA                                     | Torrance, CA                                    | Co-investigator                                                |                                                                                                   |
| David                                              | Michalik          |                              | MD                      | Miller Children's Hospital Long Beach, CA           | Long Beach, CA                                  | Co-investigator                                                |                                                                                                   |
| Jane                                               | Burns             |                              | MD                      | Rady Children's Hospital San Diego, CA              | San Diego, CA                                   | Co-investigator                                                |                                                                                                   |
| Adriana                                            | Tremoulet         |                              | MD                      | Rady Children's Hospital San Diego, CA              | San Diego, CA                                   | Co-investigator                                                |                                                                                                   |
| Michael                                            | Portman           |                              | MD                      | Seattle Children's, WA                              | Seattle, WA                                     | Co-investigator                                                |                                                                                                   |
| Charles                                            | Newcomer          |                              | MD                      | Mattel Children's Hospital, UCLA, CA                | Los Angeles, CA                                 | Co-investigator                                                |                                                                                                   |
| Gregory                                            | Kurio             |                              | MD                      | Benioff Children's Hospital, UCSF-Oakland, CA       | Oakland, CA                                     | Co-investigator                                                |                                                                                                   |
| Amy                                                | McNellis          |                              | MD                      | Benioff Children's Hospital, UCSF-San Francisco, CA | San Francisco, CA                               | Co-investigator                                                |                                                                                                   |
| Katherine                                          | Kim               |                              | MD                      | University of California Davis, CA                  | Davis, CA                                       | Co-investigator                                                |                                                                                                   |
| Jocelyn                                            | Ang               |                              | MD                      | Children's Hospital of Michigan, MI                 | Detroit, MI                                     | Co-investigator                                                |                                                                                                   |
| John                                               | Manaloor          |                              | MD                      | Indiana University, IN                              | Bloomington, IN                                 | Co-investigator                                                |                                                                                                   |
| Anne                                               | Rowley            |                              | MD                      | Lurie Children's Hospital, Chicago, IL              | Chicago, IL                                     | Co-investigator                                                |                                                                                                   |
| Guliz                                              | Erdem             |                              | MD                      | Nationwide Children's Hospital, Columbus, OH        | Columbus, OH                                    | Co-investigator                                                |                                                                                                   |
| Allison                                            | Bartlett          |                              | MD                      | University of Chicago, Chicago, IL                  | Chicago, IL                                     | Co-investigator                                                |                                                                                                   |
| Madan                                              | Kumar             |                              | MD                      | University of Chicago, Chicago, IL                  | Chicago, IL                                     | Co-investigator                                                |                                                                                                   |
| Jane                                               | Newburger         |                              | MD                      | Boston Children's Hospital, MA                      | Boston, MA                                      | Co-investigator                                                |                                                                                                   |
| Rana                                               | El Feghaly        |                              | MD                      | Boston Children's Hospital, MA                      | Boston, MA                                      | Co-investigator                                                |                                                                                                   |
| Emily                                              | Ansusinha         |                              | MD                      | Children's National Hospital, Washington DC         | Washington DC                                   | Co-investigator                                                |                                                                                                   |
| Roberta                                            | DeBiasi           |                              | MD                      | Children's National Hospital, Washington DC         | Washington DC                                   | Co-investigator                                                |                                                                                                   |
| Ashraf S.                                          | Harahsheh         |                              | MD                      | Children's National Hospital, Washington DC         | Washington DC                                   | Co-investigator                                                |                                                                                                   |
| Tova                                               | Ronis             |                              | MD                      | Children's National Hospital, Washington DC         | Washington DC                                   | Co-investigator                                                |                                                                                                   |
| Supriya                                            | Jain              |                              | MD                      | Maria Fareri Children's, NY                         | Valhalla, NY                                    | Co-investigator                                                |                                                                                                   |
| Marsha                                             | Anderson          |                              | MD                      | Children's Hospital Colorado, CO                    | Aurora, CO                                      | Co-investigator                                                |                                                                                                   |
| Samuel                                             | Dominguez         |                              | MD                      | Children's Hospital Colorado, CO                    | Aurora, CO                                      | Co-investigator                                                |                                                                                                   |
| Michelle                                           | Hite              |                              | MD                      | Children's Hospital Colorado, CO                    | Aurora, CO                                      | Co-investigator                                                |                                                                                                   |

Supplemental Online Content: Nonauthor Collaborators

\*First name, last name, and suffix (if applicable) are required and will appear in PubMed.

| <b>*First Name and Middle Initial(s)</b> | <b>*Last Name</b> | <b>*Suffix (eg, Jr, III)</b> | Academic Degrees | Institution                                  | Location (city, state/province, country) | Role or Contribution, eg, chair, principal investigator | Group (if more than 1 Group listed in the byline) and/or Subgroup (eg, Steering Committee) |
|------------------------------------------|-------------------|------------------------------|------------------|----------------------------------------------|------------------------------------------|---------------------------------------------------------|--------------------------------------------------------------------------------------------|
| Pei-Ni                                   | Jone              |                              | MD               | Children's Hospital Colorado, CO             | Aurora, CO                               | Co-investigator                                         |                                                                                            |
| Kari                                     | Simonsen          |                              | MD               | University of Nebraska Medical Center, NE    | Omaha, NE                                | Co-investigator                                         |                                                                                            |
| Archana                                  | Chatterjee        |                              | MD               | University of South Dakota-Sanford, SD       | Vermillion, SD                           | Co-investigator                                         |                                                                                            |
| Dongngan                                 | Truong            |                              | MD               | University of Utah, UT                       | Salt Lake City, UT                       | Co-investigator                                         |                                                                                            |
| Jose                                     | Romero            |                              | MD               | Arkansas Children's Hospital, AR             | Little Rock, AR                          | Co-investigator                                         |                                                                                            |
| David                                    | Lloyd             |                              | MD               | Emory University, Atlanta, GA                | Atlanta, GA                              | Co-investigator                                         |                                                                                            |
| Nichole                                  | Samuy             |                              | MD               | University of Alabama, AL                    | Tuscaloosa, AL                           | Co-investigator                                         |                                                                                            |
| Paul                                     | Scalici           |                              | MD               | University of Alabama, AL                    | Tuscaloosa, AL                           | Co-investigator                                         |                                                                                            |
| Kavita                                   | Sharma            |                              | MD               | University of Texas Southwestern, Dallas, TX | Dallas, TX                               | Co-investigator                                         |                                                                                            |
| Natasha                                  | Halasa            |                              | MD               | Vanderbilt, Nashville, TN                    | Nashville, TN                            | Co-investigator                                         |                                                                                            |
